# Supplementary material
Source: PubMed Central journal article supplement (PMC6346271)
Supplement: NIHMS1512966-supplement-1.pdf [file NIHMS1512966-supplement-1.pdf]

# **Supporting Information**

# Figure S1

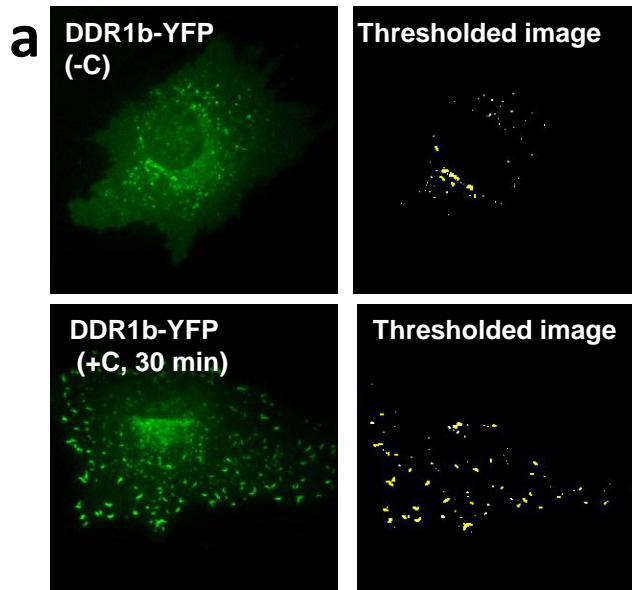

**Figure S1a: Methodology for quantitative analysis of the number of punctate structures in DDR1b-YFP cells.** Images were thresholded and particles with circularity  $< 0.99$  and area  $< 10 \mu\text{m}^2$  were selected for analysis. As shown above these settings selected the majority of DDR1b-YFP clusters while excluding very smaller globular particles or nuclear signal present in cells. The selected structures are marked by yellow overlay on the thresholded particles (white).

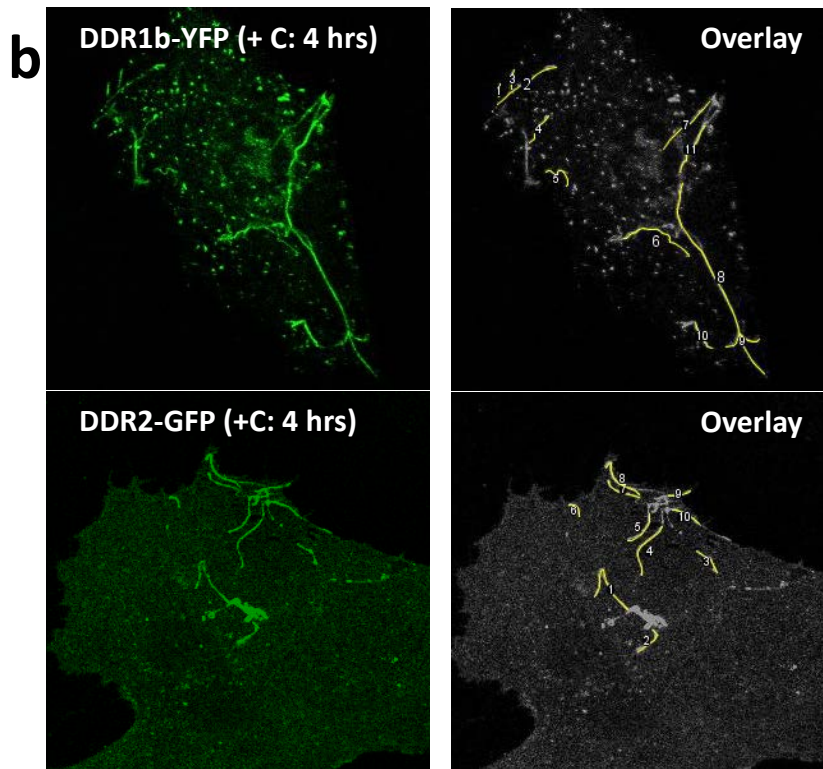

**Figure S1b: Methodology for quantitative analysis of the length of filamentous structures in DDR1b-YFP- or DDR2-GFP- expressing cells.** The maximum uninterrupted contour length of filaments was manually traced using a freehand line, until an overlap, joint or tangle was encountered. Tracked filaments are shown in yellow in the overlay images.

# Figure S2

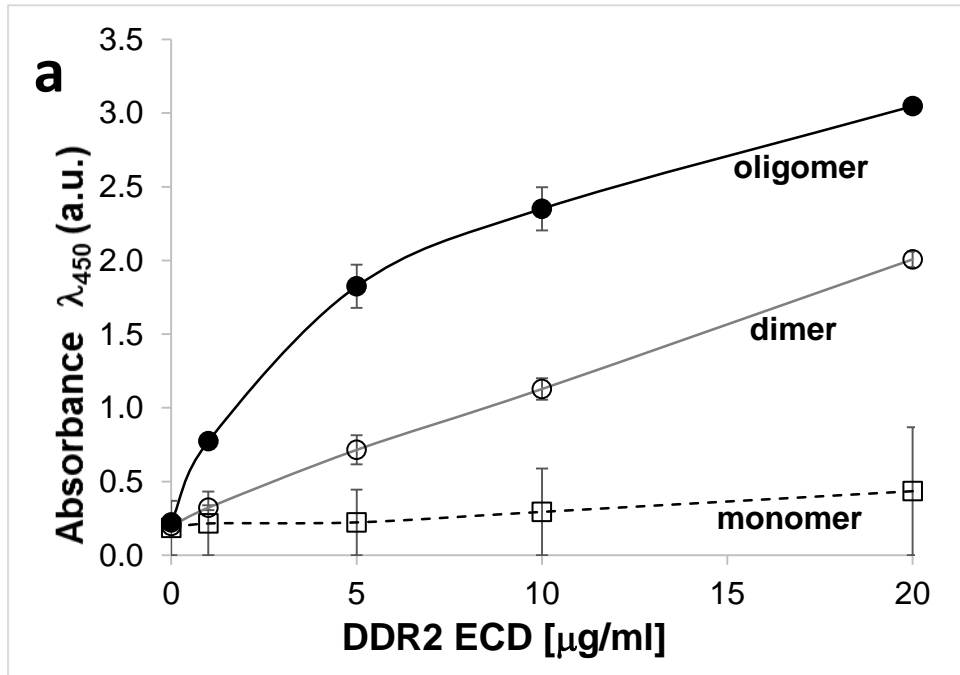

**Figure S2a: Binding of DDR2 ECD to rat-tail collagen.** Solid phase binding assay for binding of various oligomeric forms of recombinant DDR2 ECD to immobilized rat collagen. Experimental details were similar to that used for bovine collagen (Figure 2a).  $EC_{50}$  for oligomeric DDR2 ( $3.6 \pm 0.37$ ) was  $\sim 4$  times lower than that for dimeric DDR2 ( $14.15 \pm 0.84 \mu\text{g/ml}$ ),  $p < 0.0001$ .

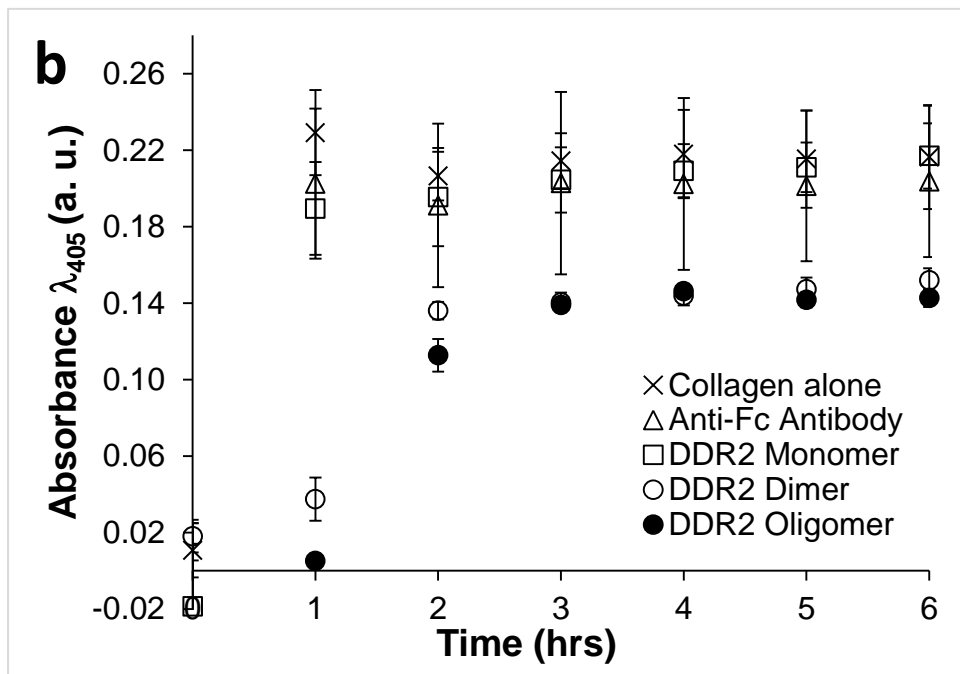

**Figure S2b: Effect of the oligomeric state of DDR2 ECD on fibrillogenesis of rat-tail collagen.** Turbidity of collagen solutions with or without DDR2 ECD (as indicated) was monitored every hour for 6 hours. Experimental details are similar to that used for bovine collagen as in Figure 2b.

**Figure S3**

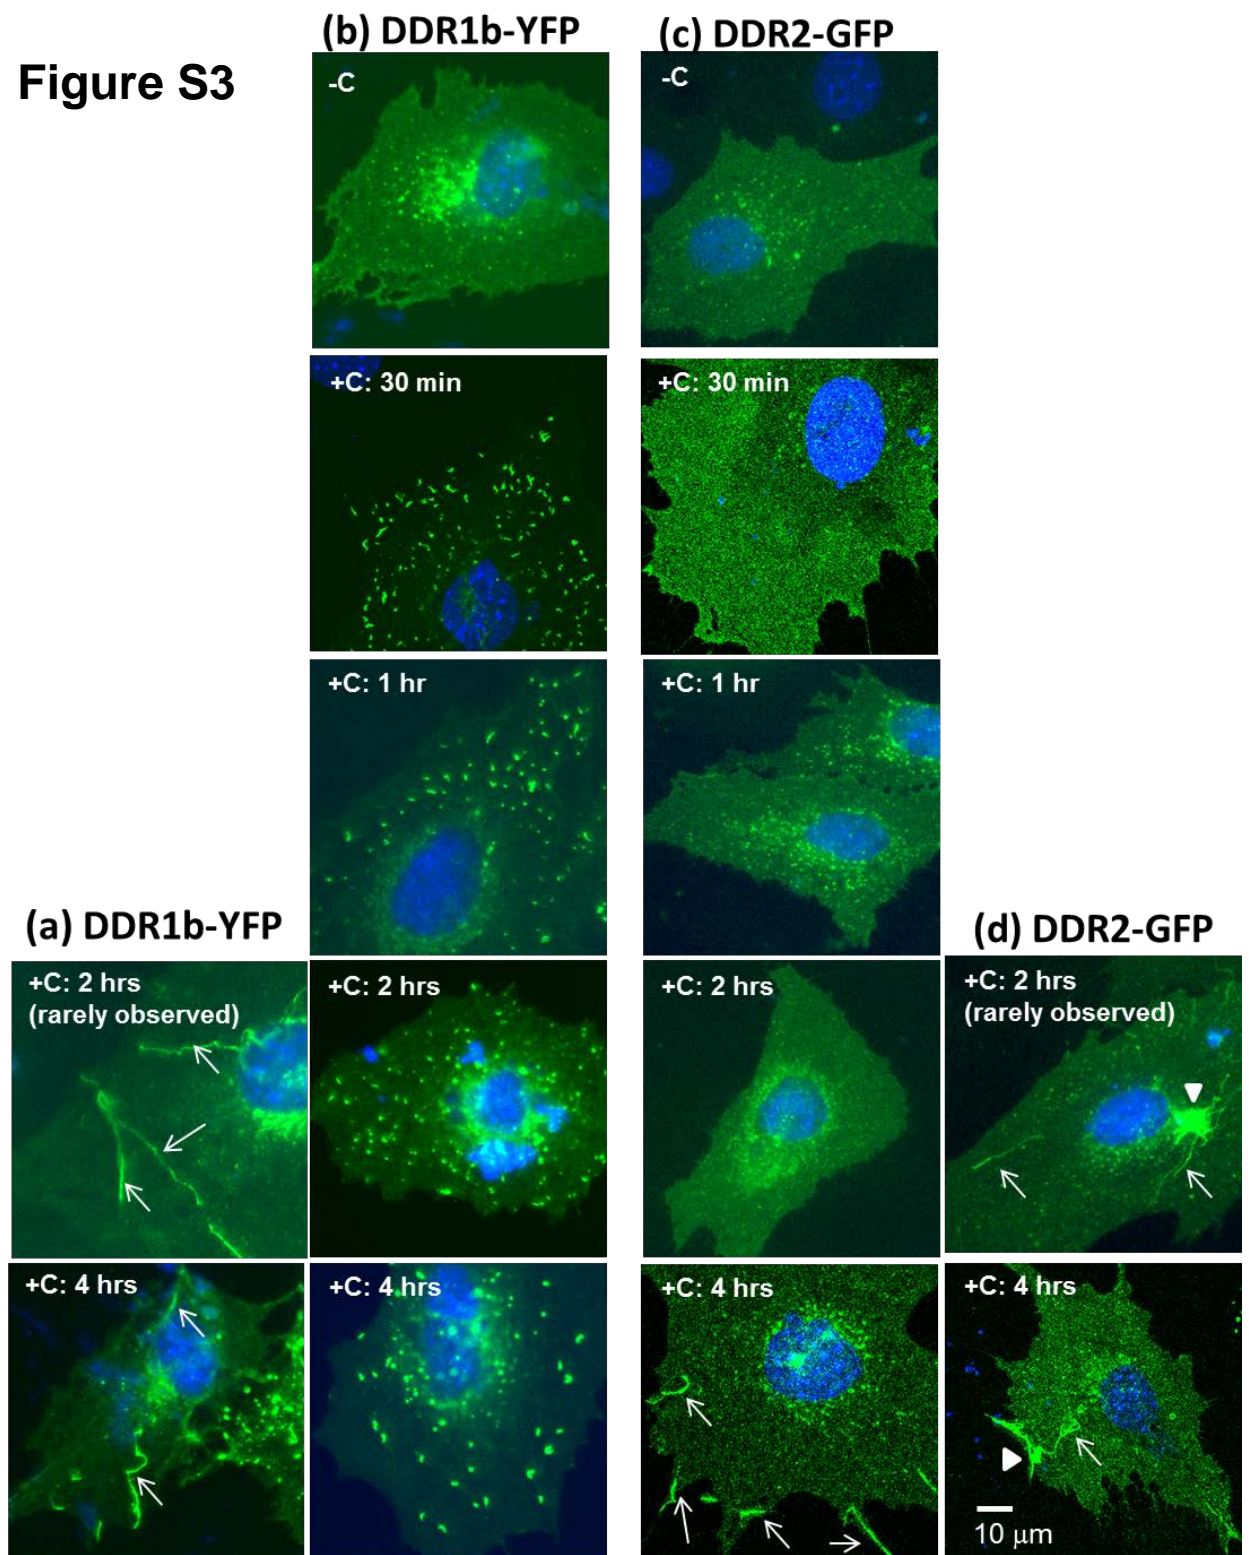

**Figure S3: Effect of bovine-dermal collagen on spatio-temporal distribution of DDR1b-YFP and DDR2-GFP in fixed MC3T3 cells.** The central columns (b) and (c) show the commonly observed spatial distribution of DDRs (green) in cells. Upon stimulation with soluble collagen (+C), DDR1b-YFP forms clusters which persist in several cells even up to 4 hrs. DDR2-GFP on the other hand does not show evidence of cluster formation. At 4 hrs of collagen stimulation, a sub-population of both DDR1b-YFP and DDR2-GFP expressing cells (columns, a and d), show spatial distribution of DDRs into filamentous structures (arrows) and tangles (arrowheads). Such filamentous structures were rarely observed at the 2hr (or earlier) time-points. The morphology of filamentous structures when observed at 2hrs resembled those that were formed at 4 hrs. Scale bar is same for all panels. Blue indicates nuclear staining.

## Figure S4

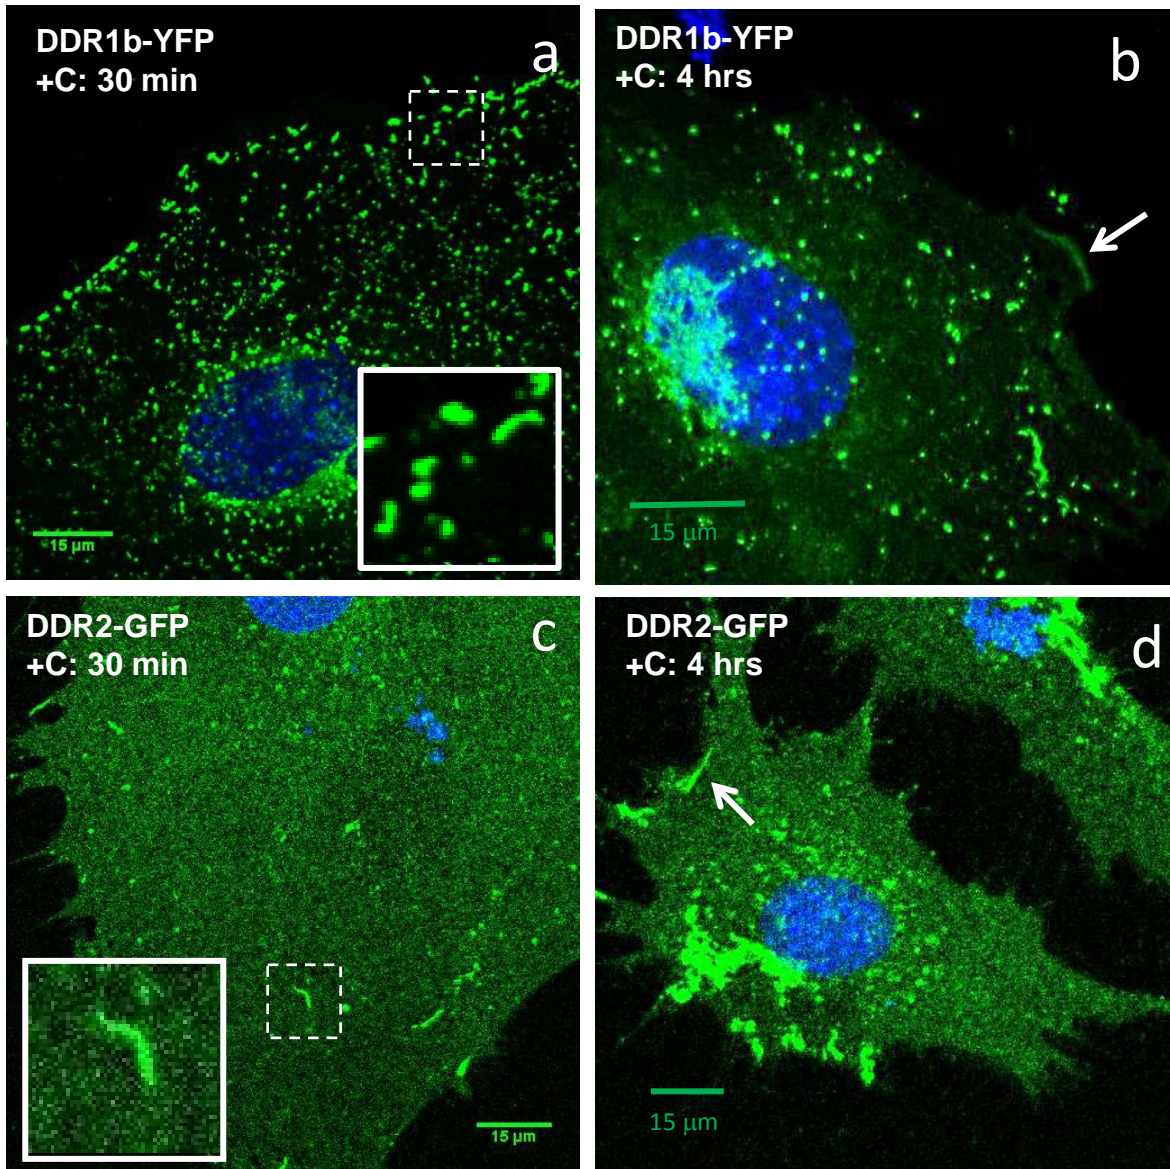

**Figure S4: Effect of rat-tail collagen on spatial distribution of DDR1b-YFP and DDR2-GFP in MC3T3 cells.** Similar to results with bovine collagen (Fig. 4), DDR1b-YFP (in a) shows evidence of small, punctate structures or ‘cluster formation’ upon stimulation with rat tail collagen, which persisted in several cells even after 4 hr of collagen stimulation (in b). Such a cluster formation was not observed for DDR2-GFP (in c) but DDR2-GFP was observed to assemble into small filamentous structures as early as 30 min post collagen stimulation. After 4 hrs of stimulation (b, d) YFP/GFP positive filamentous structures (arrows) and/or tangles of filaments were visible on both DDR1b-YFP- and DDR2-GFP- expressing cells.

# Figure S5

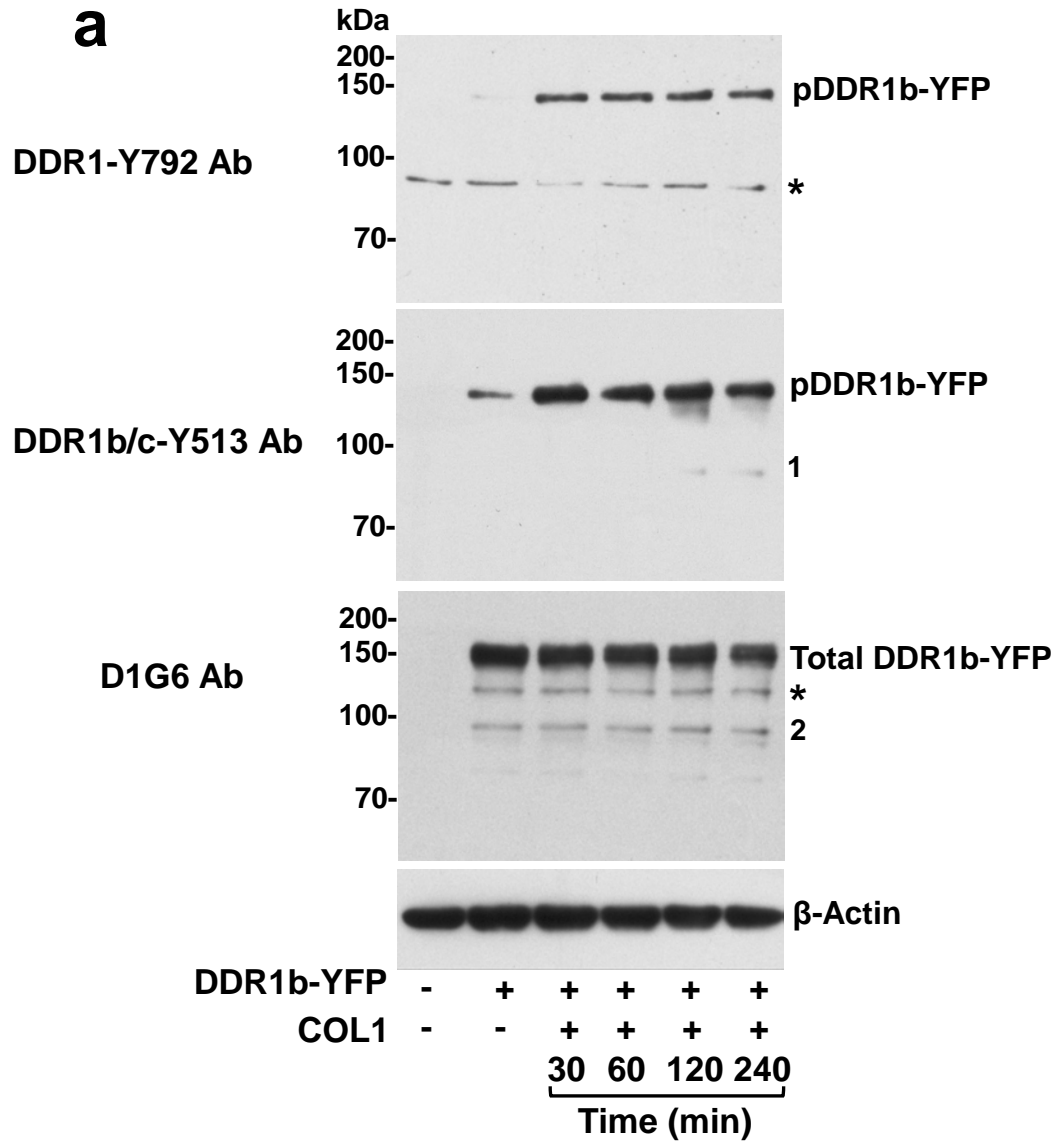

## Figure S5, cont'd

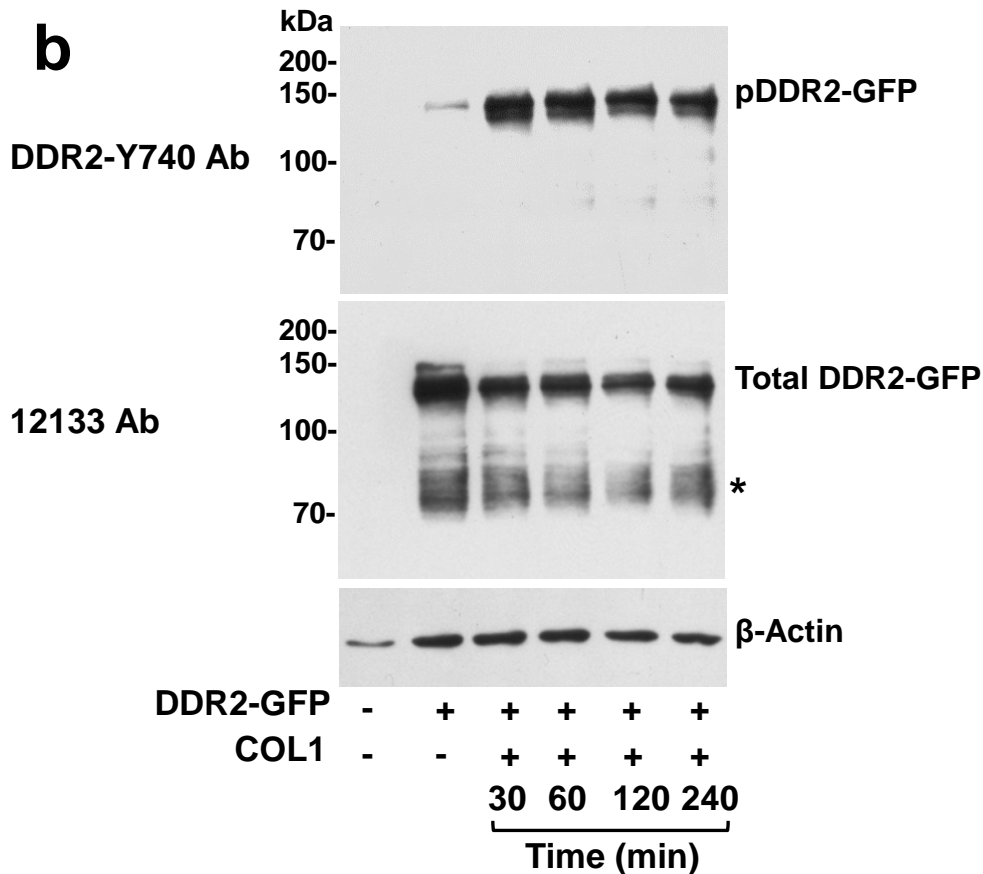

**Figure S5. Expression and phosphorylation of DDR1b-YFP and DDR2-GFP.** Cos1 cells were either untransfected (-) or transfected (-) with expression vectors encoding either DDR1b-YFP (a) or DDR2-GFP (b), as described in Materials and Methods. Twenty-six hrs after transfection, the cells were washed with DPBS and serum starved O/N. Subsequently, the cells were treated with vehicle (20 ml of 0.02N acetic acid) (-) or 20  $\mu$ g/ml (final concentration) of rat tail collagen I (+) for various times, as indicated. The cells were then lysed in RIPA buffer and equal protein concentrations (25  $\mu$ g/lane) were resolved by reducing 7.5% SDS-PAGE followed by immunoblotting. In the case of DDR1b-YFP (Panel a), the membrane was first probed with antibodies to DDR1-Y792, followed by stripping, and re-probing with DDR1b/c-Y513 antibodies. The membrane was stripped again and then re-probed with D1G6 antibodies against total DDR1. In the case of DDR2-GFP (Panel b), the membrane was first probed with DDR2-Y740 antibodies followed by stripping and re-probing with 12133 antibodies against total DDR2. Numbers 1 and 2, in the DDR1b/c-Y513 and total DDR1 blots of pDDR1b-YFP, respectively, likely represent the cleaved C-terminal fragment of DDR1<sup>33</sup>. Asterisks (\*): non-specific bands.

## Figure S6

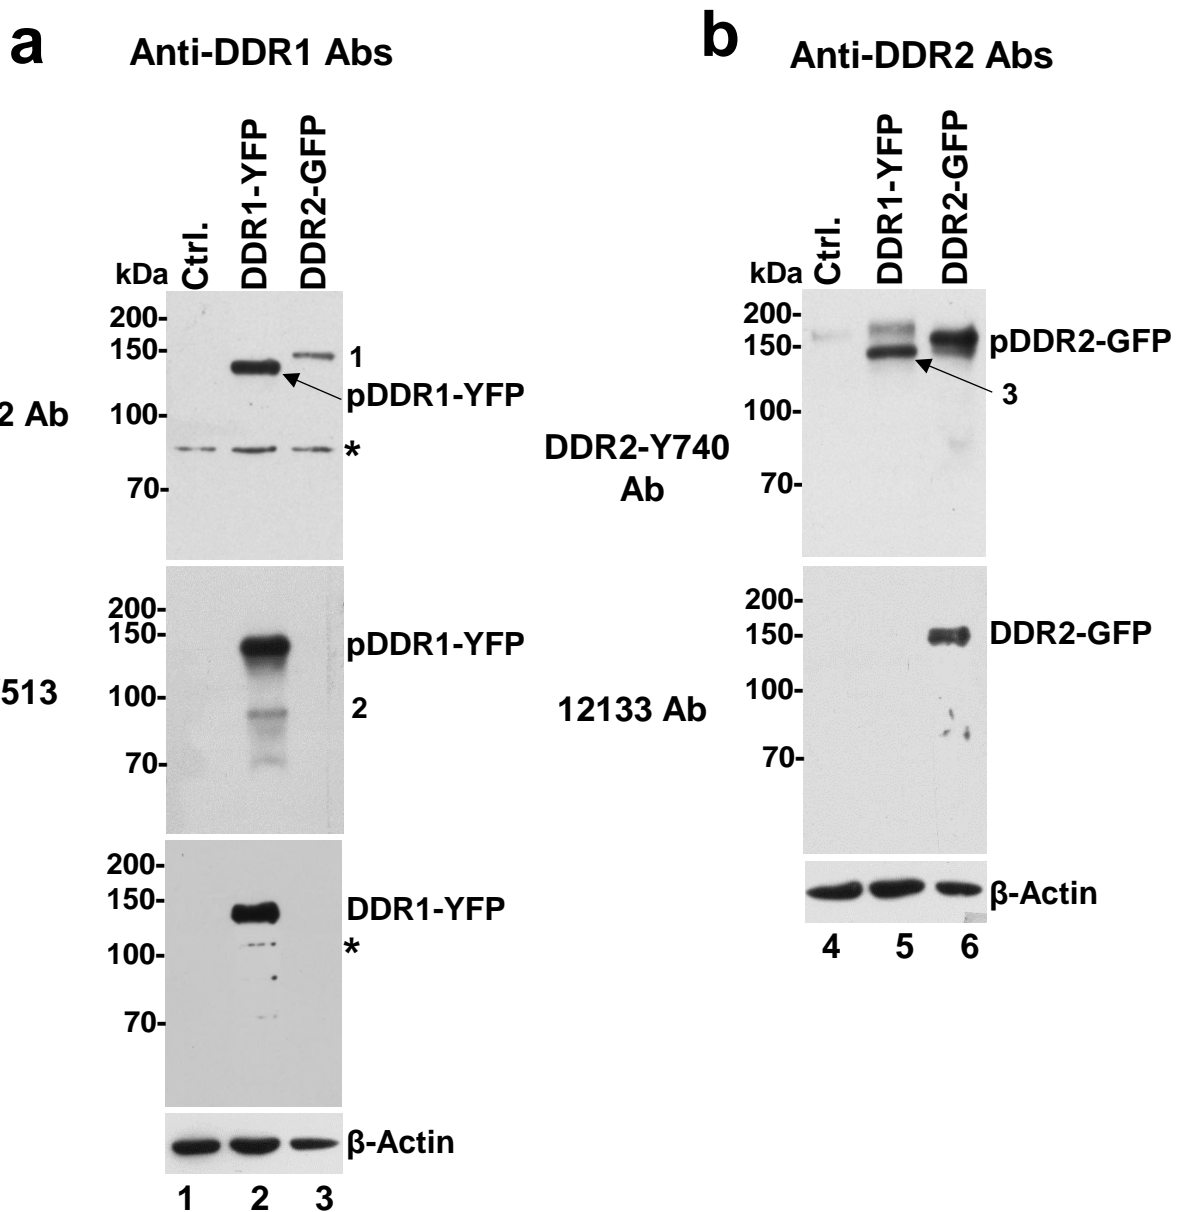

**Figure S6: Specificity and cross-reactivity of DDR antibodies.** Cos1 cells were untransfected (lanes 1 and 4, Ctrl.) or transfected with plasmid vectors encoding human DDR1b-YFP (lanes 2 and 5) or DDR2-GFP (lanes 3 and 6). After 26 hrs, the cells were washed with DPBS and serum starved O/N. Subsequently, the cells were treated with 20  $\mu\text{g/ml}$  (final concentration) of rat tail collagen I for 2 hrs. The cells were then lysed in RIPA buffer and equal protein concentrations (25  $\mu\text{g/lane}$ ) were resolved by reducing 7.5% SDS-PAGE followed by immunoblot analyses using various antibodies to total or phosphorylated DDRs, as indicated.  $\beta$ -actin was used as loading control. Number 1 in the DDR1-Y792 blot (lane 3) may represent cross reactivity of this pDDR1 antibody with pDDR2-GFP. Number 2 in the DDR1b/c-Y513 blot (lane 2) likely represents the C-terminal fragment of pDDR1b-YFP. Number 3 in the DDR2-Y740 blot (lane 5) may represent a cross reactivity of this pDDR2 antibody with pDDR1b-YFP. Asterisk (\*): non-specific band.



## Figure S7

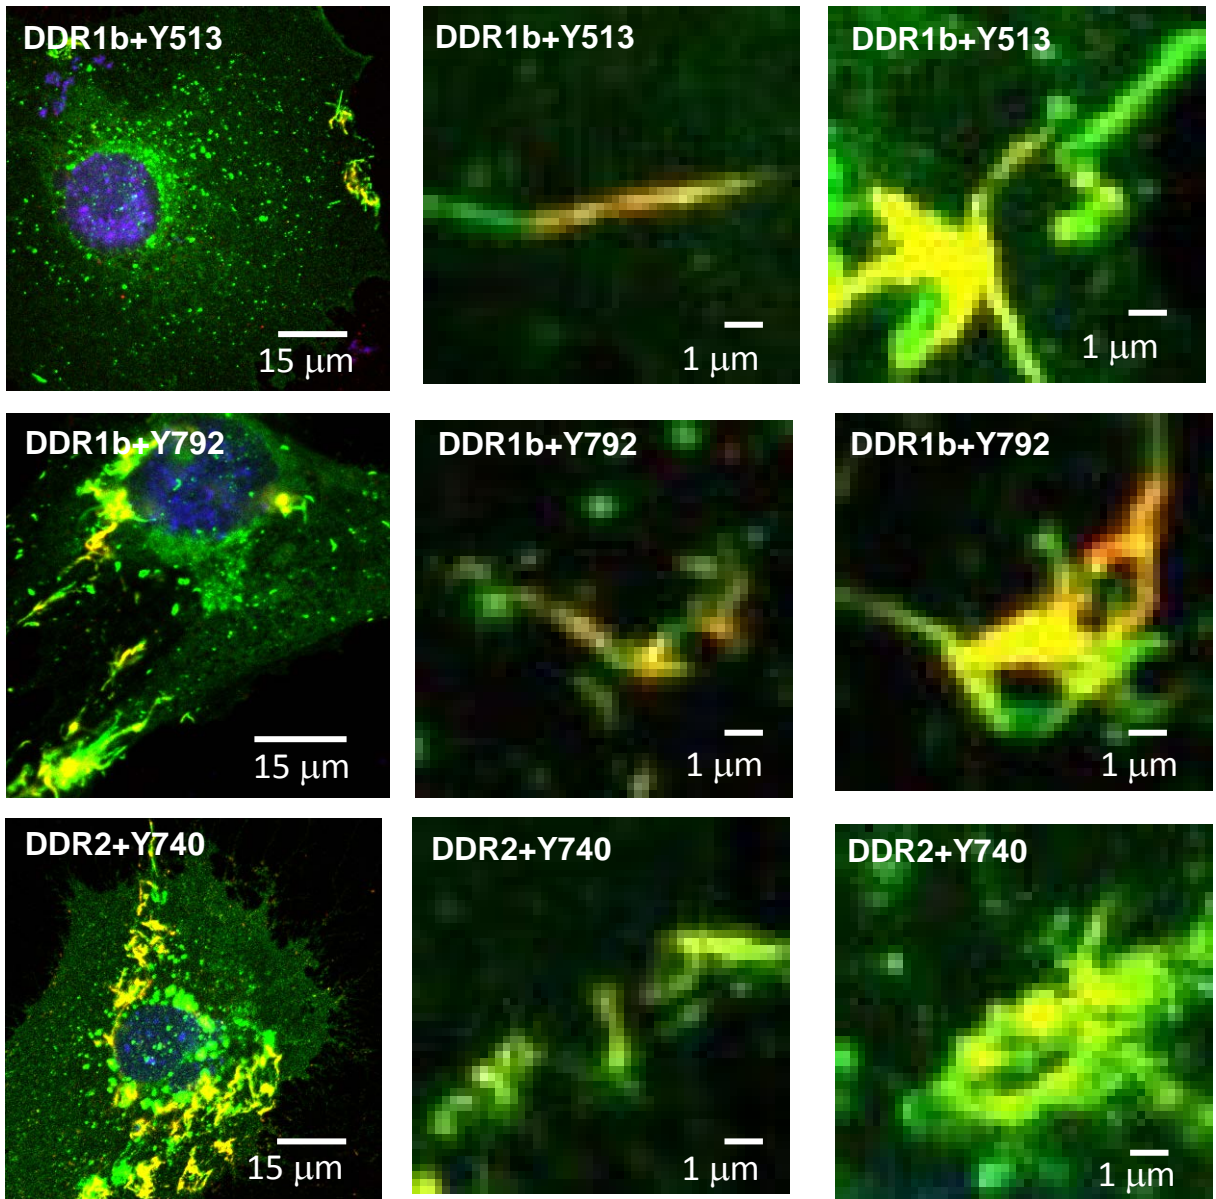

**Figure S7: Immunocytochemistry (ICC) for spatial distribution of DDR1b-YFP and DDR2-GFP phosphorylation upon stimulation with rat tail collagen.** After 4 hrs of stimulation with rat tail collagen the cells were stained for pDDR antibodies as indicated. Column 1 shows a whole cell with YFP/GFP signal (green) and its co-localization (yellow) with pDDR antibodies as indicated. Columns 2 and 3 are regions selected from two different cells showing that phosphorylation (yellow) was pre-dominantly present on filamentous structures and tangles of filaments as observed with bovine collagen in Figures 9 and 10b.

## Figure S8

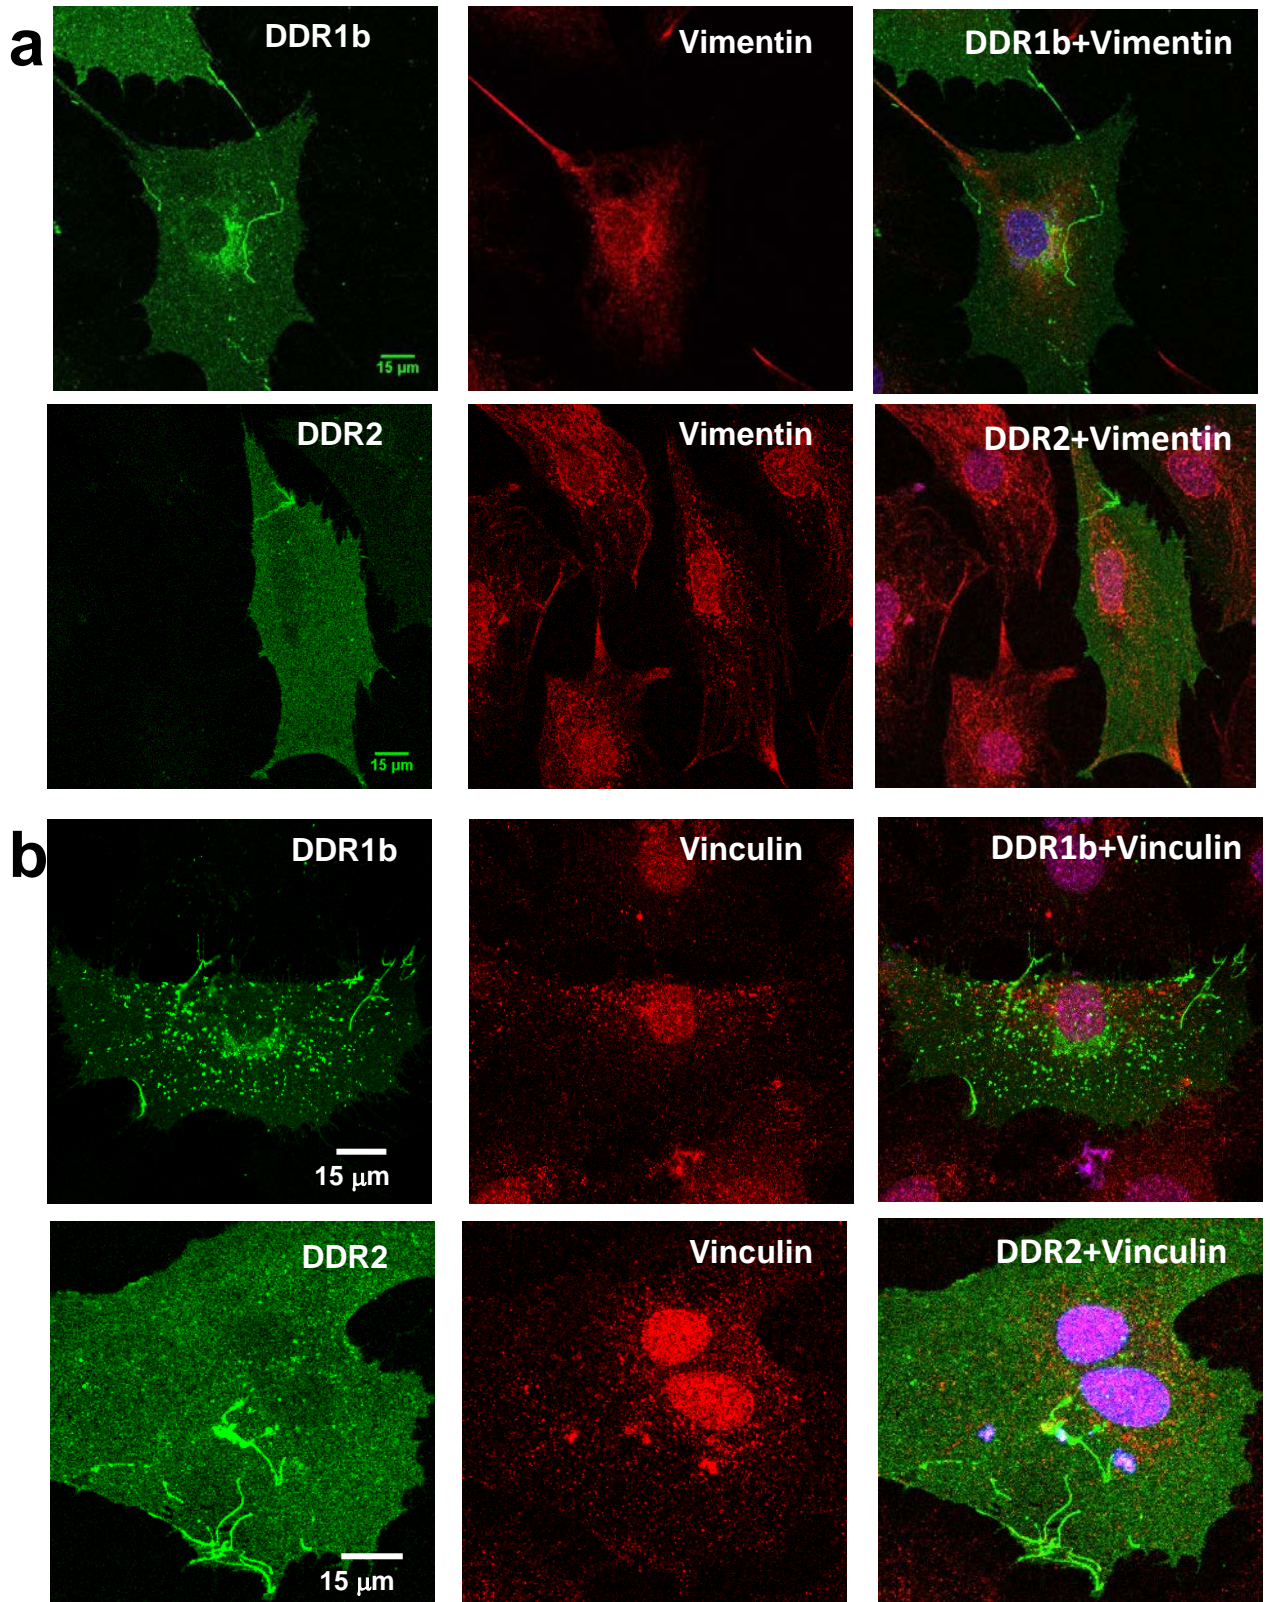

**Figure S8: ICC for spatial distribution of DDRs and vimentin/vinculin.** DDR1b-YFP- or DDR2-GFP-expressing cells stimulated with bovine-dermal collagen for 4 hrs revealed the formation of filamentous structures (green). However immunostaining for vimentin (red) (a) or vinculin (red) (b) revealed lack of co-localization (yellow) with the filamentous structures formed by DDR1b-YFP or DDR2-GFP.

## Figure S9

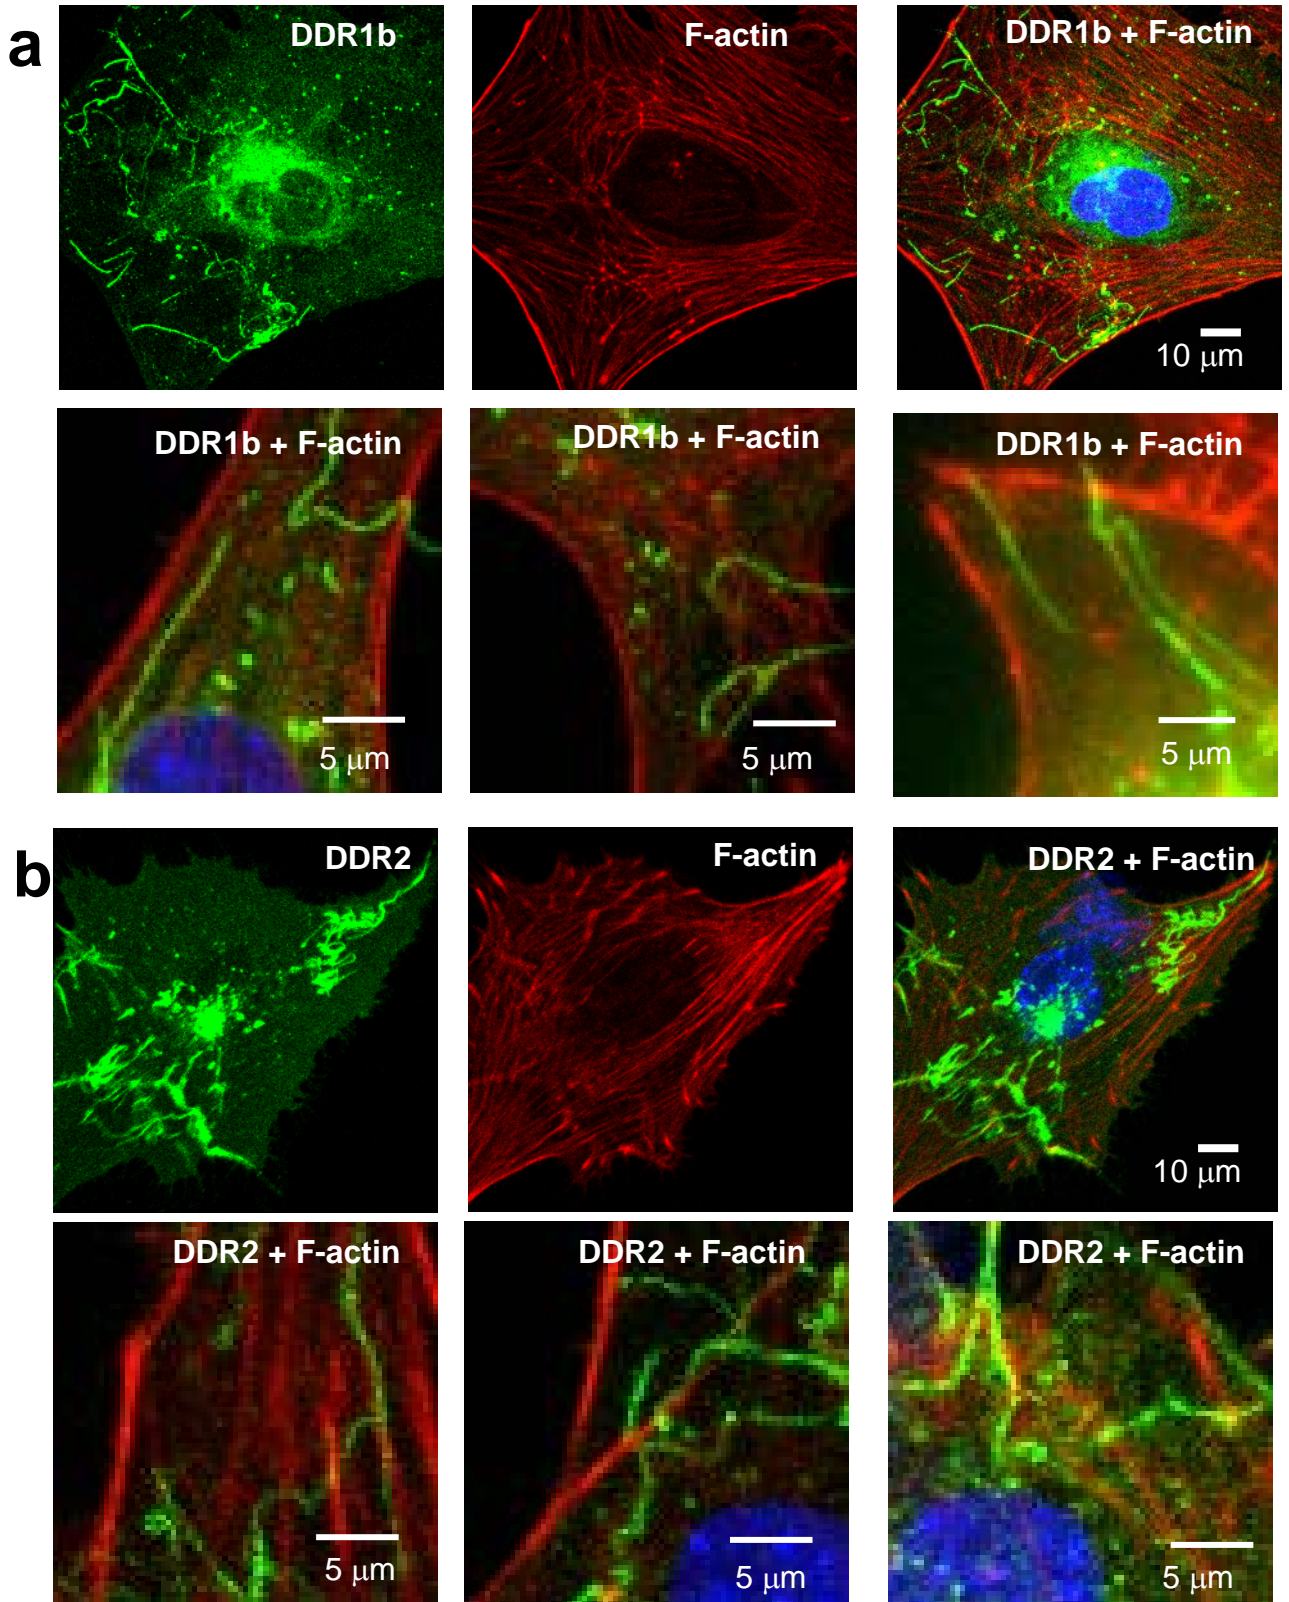

**Figure S9: ICC for spatial distribution of DDRs and F-actin.** The filamentous structures (green) formed in (a) DDR1b-YFP- or (b) DDR2-GFP- expressing cells after 4 hrs of administration of bovine-dermal collagen did not co-localize with f-actin (red). Bottom rows in panels a and b show selected regions from three different cells showing how the trajectories of DDRs and f-actin filaments were distinct with little to no co-localization (yellow).

## Figure S10

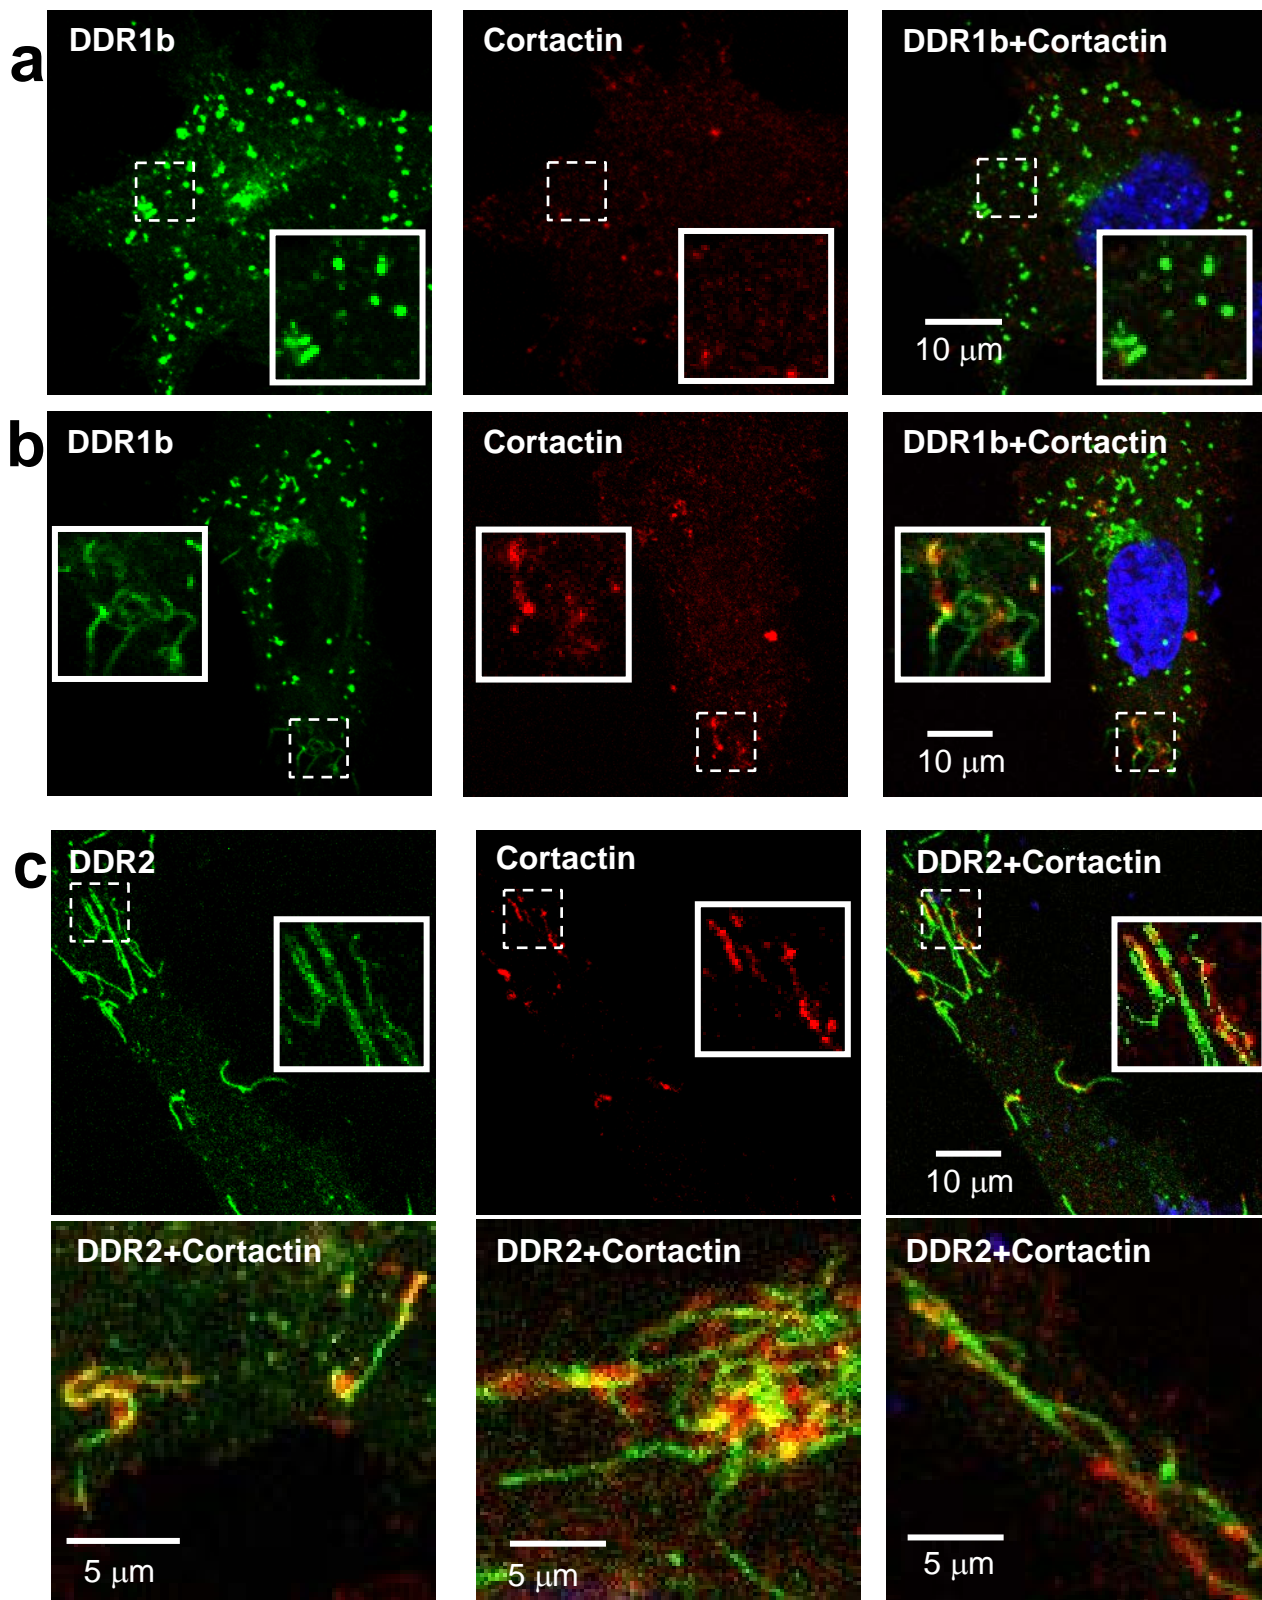

**Figure S10: ICC for spatial distribution of DDRs and cortactin.** After 4 hrs of administration of bovine dermal collagen, DDR1b-YFP clusters (green) (in a) show no co-localization with cortactin (red). However the regions of filamentous structures formed in DDR1b-YFP- (in b) and DDR2-GFP- (in c) expressing cells were enriched with cortactin with few segments showing partial co-localization ( $R=0.65 \pm 0.22$ ). Selected regions from three different cells are included in panel c.
